# Supplementary material for: Therapeutic role of miR-19a/19b in cardiac regeneration and protection from myocardial infarction
Source: PubMed Central journal article supplement (PMC6470165; doi:10.1038/s41467-019-09530-1), 2019-04-17

**Gao et al., Therapeutic role of miR-19a/19b in cardiac regeneration and protection from myocardial infarction**

**Supplementary Information**

**Supplementary Table1.** Echocardiography examination of cardiac function after intra-cardiac injection of individual miR-19a, miR-19b or control mimics at multiple time points post-MI.

|                       | MI-5d            |                  |                  | MI-2w            |                  |                  | MI-7w            |                  |                  | MI-9w            |                  |                  |
|-----------------------|------------------|------------------|------------------|------------------|------------------|------------------|------------------|------------------|------------------|------------------|------------------|------------------|
|                       | Control<br>(N=5) | miR-19a<br>(N=4) | miR-19b<br>(N=5) | Control<br>(N=5) | miR-19a<br>(N=4) | miR-19b<br>(N=6) | Control<br>(N=4) | miR-19a<br>(N=3) | miR-19b<br>(N=5) | Control<br>(N=4) | miR-19a<br>(N=4) | miR-19b<br>(N=5) |
| IVS;d(mm)             | 0.623±0.028      | 1.014±0.049**    | 1.368±0.043***   | 0.750±0.064      | 0.869±0.040      | 1.213±0.015**    | 0.976±0.047      | 0.841±0.051      | 0.971±0.016      | 0.747±0.018      | 0.850±0.037      | 0.992±0.029*     |
| IVS;s(mm)             | 0.795±0.024      | 1.532±0.033**    | 1.654±0.056***   | 0.999±0.010      | 1.417±0.039      | 1.749±0.014**    | 1.513±0.036      | 1.417±0.080      | 1.352±0.056      | 1.101±0.087      | 1.304±0.028      | 1.422±0.033      |
| LVID;d(mm)            | 3.665±0.107      | 3.468±0.075      | 3.263±0.101      | 3.905±0.081      | 3.268±0.106      | 3.383±0.078*     | 3.142±0.099      | 3.022±0.237      | 3.745±0.028**    | 3.989±0.100      | 3.915±0.112      | 4.057±0.149      |
| LVID;s(mm)            | 3.183±0.137      | 2.231±0.138*     | 2.452±0.094*     | 3.220±0.113      | 2.170±0.148*     | 2.223±0.116*     | 2.273±0.095      | 1.777±0.221      | 2.552±0.051      | 3.171±0.116      | 2.608±0.167      | 2.782±0.149      |
| LVPW;d(mm)            | 0.716±0.045      | 0.876±0.040      | 1.033±0.020*     | 0.891±0.009      | 0.953±0.027      | 0.865±0.055      | 0.905±0.044      | 0.987±0.010      | 0.909±0.012      | 0.921±0.019      | 0.892±0.024      | 0.893±0.029      |
| LVPW;s(mm)            | 0.801±0.047      | 1.294±0.080*     | 1.370±0.043**    | 1.151±0.034      | 1.307±0.049      | 1.333±0.078      | 1.378±0.057      | 1.503±0.037      | 1.450±0.030      | 1.207±0.071      | 1.394±0.049      | 1.393±0.084      |
| EF(%)                 | 29.765±2.904     | 64.177±5.301*    | 48.95±3.438*     | 37.160±3.069     | 63.226±4.050*    | 63.540±2.986*    | 54.894±2.269     | 74.268±3.405*    | 60.523±1.405     | 41.954±3.202     | 62.757±3.503*    | 60.370±2.055*    |
| FS(%)                 | 13.905±1.492     | 35.838±3.617*    | 28.247±1.529*    | 17.991±1.657     | 34.335±2.887*    | 32.680±4.544*    | 27.775±1.496     | 42.307±2.661*    | 31.988±0.980     | 20.586±1.834     | 34.190±2.518*    | 32.164±1.407*    |
| LV Mass(mg)           | 81.080±5.915     | 118.765±5.158*   | 156.161±9.908**  | 116.427±3.932    | 104.325±7.972    | 135.851±12.487   | 100.676±4.753    | 93.367±12.100    | 132.468±2.728*   | 123.697±3.46     | 130.690±10.396   | 148.531±3.222*   |
| LV Mass(Corrected,mg) | 64.863±4.732     | 95.012±4.127*    | 124.929±7.927**  | 93.142±3.146     | 83.460±6.377     | 108.681±9.990    | 80.450±3.802     | 74.693±9.680     | 105.974±2.183*   | 98.958±2.770     | 104.552±8.317    | 118.825±2.577*   |
| LV Vol;d(ul)          | 58.328±3.744     | 50.175±2.666     | 47.128±3.658     | 66.966±3.100     | 43.986±3.598*    | 51.564±4.919*    | 39.946±3.158     | 37.800±7.069     | 59.984±1.028**   | 70.348±4.136     | 67.514±4.526     | 75.325±6.465     |
| LV Vol;s(ul)          | 42.842±3.900     | 18.162±2.681*    | 21.708±2.398*    | 43.208±3.196     | 17.223±2.705     | 21.711±4.374*    | 18.251±1.994     | 11.085±3.430     | 23.970±0.141     | 41.111±3.563     | 26.881±3.886     | 31.888±4.034     |

Wild type C57BL/6 mice were randomly subjected to intra-cardiac injection of miR-19a, miR-19b or control mimics after myocardium infarction (MI) surgery, respectively. Echocardiography analyses of cardiac function were performed at multiple time points post-MI surgery from miR-19a/19b and control group. N of each group was indicated. \*:  $P<0.05$ ; \*\*:  $P<0.01$  vs. control group. IVS;d: Interventricular septal thickness at diastole; IVS;s: Interventricular septal thickness at systole; LVID;d: Left ventricular end diastolic internal dimension; LVID;s: Left ventricular end systolic internal dimension; LVPW;d: Left ventricular end diastolic posterior wall dimension; LVPW;s: Left ventricular end systolic posterior wall dimension; EF: Ejection fraction; FS: Fractional shortening; LV Vol;d: Left ventricular end diastolic volume. LV Vol;s: Left ventricular end systolic volume.

**Supplementary Table2.** Echocardiography examination of cardiac function after intra-cardiac injection of miR-19a/19b or control mimics at multiple time points of post-MI.

|                         | 2 - 4 weeks post-MI |                       | 2 months post-MI |                       | 4 months post-MI |                       | 1 year post-MI   |                      |
|-------------------------|---------------------|-----------------------|------------------|-----------------------|------------------|-----------------------|------------------|----------------------|
|                         | Control<br>(n=8)    | miR-19a/19b<br>(n=12) | Control<br>(N=5) | miR-19a/19b<br>(N=10) | Control<br>(N=5) | miR-19a/19b<br>(N=10) | Control<br>(N=3) | miR-19a/19b<br>(N=4) |
| IVS;d (mm)              | 0.463±0.074         | 0.523±0.093           | 0.735±0.219      | 0.606±0.088           | 0.921±0.160      | 0.731±0.093*          | 0.561±0.134      | 1.036±0.229*         |
| IVS;s (mm)              | 0.520±0.074         | 0.634±0.083**         | 0.767±0.238      | 0.861±0.148           | 1.151±0.162      | 0.977±0.088*          | 0.604±0.178      | 1.362±0.209**        |
| LVID;d (mm)             | 5.024±0.805         | 4.383±0.522*          | 5.693±0.707      | 4.773±0.601*          | 5.733±1.322      | 4.937±0.524           | 5.299±0.818      | 4.680±0.632          |
| LVID;s (mm)             | 4.038±0.948         | 3.027±0.550**         | 4.824±0.921      | 3.464±0.723**         | 4.970±1.503      | 3.641±0.686*          | 5.010±0.945      | 3.762±0.619          |
| LVPW;d (mm)             | 0.483±0.043         | 0.575±0.029**         | 0.730±0.198      | 0.703±0.077           | 0.877±0.141      | 0.787±0.105           | 1.285±0.251      | 1.069±0.270          |
| LVPW;s (mm)             | 0.637±0.080         | 0.774±0.110**         | 0.848±0.180      | 0.947±0.112           | 1.010±0.082      | 0.980±0.179           | 1.525±0.265      | 1.313±0.195          |
| EF (%)                  | 41.05±12.16         | 59.04±8.20**          | 32.51±11.06      | 53.72±10.45**         | 29.62±11.39      | 51.51±11.32**         | 12.853±7.755     | 39.24±14.61*         |
| FS (%)                  | 20.43±6.90          | 31.34±5.55**          | 15.78±5.79       | 28.08±6.76**          | 14.20±5.69       | 26.79±7.34**          | 5.786±3.560      | 19.48±8.46*          |
| LV Mass (mg)            | 90.77±20.68         | 85.50±19.12           | 189.06±45.08     | 124.86±36.07*         | 257.47±102.49    | 159.40±39.33*         | 238.43±116.70    | 218.36±34.36         |
| LV Mass (Corrected, mg) | 72.62±16.55         | 68.40±15.29           | 151.25±36.06     | 99.89±28.86*          | 205.98±81.99     | 127.52±31.47*         | 190.74±93.36     | 174.69±27.48         |
| LV Vol;d (uL)           | 123.39±45.51        | 88.58±24.58*          | 162.33±47.56     | 108.30±31.62*         | 171.78±100.73    | 116.48±27.10          | 138.30±49.93     | 103.38±29.45         |
| LV Vol;s (uL)           | 76.79±41.78         | 37.56±16.16**         | 113.36±52.01     | 52.67±25.59**         | 128.91±101.62    | 58.67±24.10           | 122.80±53.69     | 62.50±24.55          |
| Heart Rate (BMP)        | 626±31              | 633±24                | 612±66           | 665±21*               | 585±60           | 631±16*               | 533.04±42.55     | 478.68±87.03         |

Wild type C57BL/6 mice were randomly subjected to intra-cardiac injection of miR-19a/19b or control mimics after myocardium infarction (MI) surgery, respectively. Echocardiography analyses of cardiac function were performed at multiple time points post-MI surgery from miR-19a/19b and control group. N of each group was indicated. \*:  $P < 0.05$ ; \*\*:  $P < 0.01$  vs. control group. IVS;d: Interventricular septal thickness at diastole; IVS;s Interventricular septal thickness at systole; LVID;d: Left ventricular end diastolic internal dimension; LVID;s: Left ventricular end systolic internal dimension; LVPW;d: Left ventricular end diastolic posterior wall dimension; LVPW;s: Left ventricular end systolic posterior wall dimension; EF: Ejection fraction; FS: Fractional shortening; LV Vol;d: Left ventricular end diastolic volume. LV Vol;s: Left ventricular end systolic volume.

**Supplementary Table 3.** Echocardiography examination of cardiac function after intra-cardiac injection of AAV9-cTNT-miR-19a/19b or control AAV at multiple time points post-MI.

|                         | 1 day post-MI     |                        | 7 days post-MI    |                        | 2 weeks post-MI   |                        | 2 months post-MI  |                        | 3 months post-MI  |                        |
|-------------------------|-------------------|------------------------|-------------------|------------------------|-------------------|------------------------|-------------------|------------------------|-------------------|------------------------|
|                         | AAV-Ctrl<br>(n=4) | AAV-miR-19a/b<br>(n=6) | AAV-Ctrl<br>(n=4) | AAV-miR-19a/b<br>(n=6) | AAV-Ctrl<br>(n=4) | AAV-miR-19a/b<br>(n=6) | AAV-Ctrl<br>(n=6) | AAV-miR-19a/b<br>(n=6) | AAV-Ctrl<br>(n=6) | AAV-miR-19a/b<br>(n=7) |
| IVS;d (mm)              | .832±0.117        | 0.994±0.109            | 0.653±0.184       | 0.842±0.187            | 0.563±0.086       | 0.577±0.022            | 0.718±0.123       | 0.622±0.084            | 0.595±0.040       | 0.583±0.078            |
| IVS;s (mm)              | 1.481±0.172       | 1.509±0.096            | 0.912±0.346       | 1.313±0.277*           | 0.617±0.102       | 0.657±0.103            | 0.753±0.129       | 0.823±0.088            | 0.644±0.149       | 0.747±0.083            |
| LVID;d (mm)             | 3.261±0.727       | 3.245±0.238            | 4.087±0.389       | 3.905±0.391            | 4.554±0.466       | 3.754±0.647            | 5.024±0.603       | 4.387±0.568            | 5.082±0.402       | 4.273±0.483**          |
| LVID;s (mm)             | 1.991±0.728       | 2.128±0.325            | 3.338±0.659       | 2.846±0.417            | 3.595±0.628       | 2.291±0.537**          | 4.190±1.015       | 2.804±0.502*           | 4.218±0.646       | 2.833±0.660**          |
| LVPW;d (mm)             | 0.981±0.494       | 0.855±0.139            | 0.537±0.129       | 0.510±0.092            | 0.667±0.107       | 0.688±0.079            | 0.736±0.139       | 0.675±0.047            | 0.610±0.073       | 0.701±0.084            |
| LVPW;s (mm)             | 1.373±0.449       | 1.193±0.226            | 0.748±0.166       | 0.788±0.188            | 0.771±0.120       | 0.849±0.150            | 0.805±0.104       | 0.932±0.143            | 0.687±0.117       | 0.882±0.067**          |
| EF (%)                  | 71.276±13.160     | 64.015±11.407          | 38.542±16.902     | 53.474±8.388           | 43.32±10.18       | 70.27±6.86**           | 35.11±19.84       | 66.28±5.77**           | 35.62±12.48       | 62.63±12.59**          |
| FS (%)                  | 40.754±11.513     | 34.466±8.696           | 19.019±9.830      | 27.324±5.320           | 21.45±5.63        | 39.34±5.83**           | 17.48±10.47       | 36.49±4.29**           | 17.42±6.92        | 34.32±9.49**           |
| LV Mass (mg)            | 97.872±14.605     | 102.926±8.454          | 82.520±14.168     | 90.889±19.562          | 104.03±16.21      | 79.39±26.37            | 155.65±43.46      | 104.61±18.61*          | 123.54±14.83      | 100.02±25.33           |
| LV Mass (Corrected, mg) | 78.297±11.684     | 82.341±6.763           | 66.016±11.334     | 72.711±15.650          | 83.23±12.97       | 63.51±21.10            | 124.52±34.76      | 83.69±14.89*           | 98.83±11.86       | 80.02±20.27            |
| LV Vol;d (uL)           | 45.592±21.514     | 42.679±7.496           | 74.494±15.712     | 66.942±15.132          | 96.18±24.05       | 62.47±25.26            | 121.60±34.32      | 88.85±23.70            | 123.73±21.45      | 83.16±21.88**          |
| LV Vol;s (uL)           | 15.001±10.537     | 15.390±5.537           | 47.685±19.217     | 31.679±10.651          | 56.20±24.89       | 19.40±11.21*           | 83.86±49.05       | 30.95±11.10*           | 81.67±26.79       | 32.77±17.26**          |

Wild type C57BL/6 mice were randomly subjected to intra-cardiac injection of AAV-miR-19a/19b or control AAV after myocardium infarction (MI) surgery, respectively. Echocardiography analyses of cardiac function were performed at multiple time points post-MI surgery from miR-19a/19b and control group. N of each group was indicated. \*:  $P<0.05$ ; \*\*:  $P<0.01$  vs. control group. IVS;d: Interventricular septal thickness at diastole; IVS;s Interventricular septal thickness at systole; LVID;d: Left ventricular end diastolic internal dimension; LVID;s: Left ventricular end systolic internal dimension; LVPW;d: Left ventricular end diastolic posterior wall dimension; LVPW;s: Left ventricular end systolic posterior wall dimension; EF: Ejection fraction; FS: Fractional shortening; LV Vol;d: Left ventricular end diastolic volume. LV Vol;s: Left ventricular end systolic volume.

**Supplementary Table 4.** Echocardiography examination of cardiac function after tail-vein injection of LANCER II delivered miR-19a/19b in adult mice.

|                       | MI-2w            |                      | MI-6w            |                      | MI-11w           |                       | MI-14w           |                      |
|-----------------------|------------------|----------------------|------------------|----------------------|------------------|-----------------------|------------------|----------------------|
|                       | Control<br>(N=4) | miR-19a/19b<br>(N=4) | Control<br>(N=4) | miR-19a/19b<br>(N=4) | Control<br>(N=5) | miR-19a/19b<br>(N=10) | Control<br>(N=5) | miR-19a/19b<br>(N=6) |
| IVS;d(mm)             | 0.905±0.023      | 1.127±0.033*         | 0.689±0.168      | 1.088±0.019*         | 0.693±0.044      | 1.047±0.017**         | 0.804±0.068      | 0.970±0.022          |
| IVS;s(mm)             | 1.236±0.037      | 1.755±0.043**        | 1.191±0.278      | 1.697±0.029          | 1.115±0.068      | 1.546±0.027**         | 1.216±0.112      | 1.520±0.024          |
| LVID;d(mm)            | 3.538±0.097      | 2.504±0.458**        | 3.683±0.146      | 3.374±0.114          | 3.861±0.159      | 3.570±0.087           | 4.217±0.221      | 3.812±0.086          |
| LVID;s(mm)            | 2.669±0.084      | 1.581±0.106**        | 2.473±0.036      | 2.022±0.104          | 2.926±0.222      | 2.379±0.104           | 3.459±0.285      | 2.398±0.082          |
| LVPW;d(mm)            | 1.046±0.096      | 1.747±0.046**        | 0.766±0.059      | 0.860±0.025          | 0.943±0.037      | 0.992±0.029           | 0.909±0.037      | 0.884±0.012          |
| LVPW;s(mm)            | 1.391±0.135      | 2.002±0.032*         | 1.320±0.059      | 1.423±0.014          | 1.334±0.079      | 1.547±0.032           | 1.149±0.048      | 1.472±0.021          |
| EF(%)                 | 49.449±2.103     | 68.663±2.688*        | 61.593±1.062     | 71.961±1.690*        | 40.386±2.560     | 63.489±2.044*         | 40.229±4.795     | 67.588±1.378*        |
| FS(%)                 | 24.560±1.233     | 37.254±2.172*        | 32.501±0.800     | 40.398±1.398*        | 19.671±1.425     | 36.113±1.597*         | 20.433±2.715     | 37.431±1.220*        |
| LV Mass(mg)           | 128.490±8.735    | 149.726±9.956        | 84.608±13.046    | 119.694±6.832        | 126.771±6.592    | 137.607±3.990         | 134.345±5.245    | 135.573±5.928        |
| LV Mass(Corrected,mg) | 102.792±6.988    | 119.781±7.964        | 70.369±9.782     | 95.755±5.465         | 101.418±5.274    | 110.086±3.192         | 107.476±4.196    | 108.459±4.742        |
| LV Vol;d(ul)          | 52.969±3.513     | 23.392±2.726**       | 57.618±2.570     | 47.579±3.829         | 72.306±5.481     | 57.865±3.454          | 85.816±10.287    | 63.903±3.330         |
| LV Vol;s(ul)          | 42.842±3.900     | 7.698±1.357**        | 21.589±0.385     | 10.750±4.396         | 36.466±4.444     | 12.106±1.296**        | 44.631±9.1300.97 | 19.163±1.776         |

Wild type C57BL/6 mice were randomly subjected to tail-vein injection of miR-19a/19b or control mimics after myocardium infarction (MI) surgery, respectively. Echocardiography analyses of cardiac function were performed at multiple time points post-MI surgery from miR-19a/19b and control group. N of each group was indicated. \*:  $P < 0.05$ ; \*\*:  $P < 0.01$  vs. control group. IVS;d: Interventricular septal thickness at diastole; IVS;s Interventricular septal thickness at systole; LVID;d: Left ventricular end diastolic internal dimension; LVID;s: Left ventricular end systolic internal dimension; LVPW;d: Left ventricular end diastolic posterior wall dimension; LVPW;s: Left ventricular end systolic posterior wall dimension; EF: Ejection fraction; FS: Fractional shortening; LV Vol;d: Left ventricular end diastolic volume. LV Vol;s: Left ventricular end systolic volume.

**Supplementary Table 5.** Echocardiography examination of cardiac function after tail-vein injection of RNAiMAX delivered miR-19a/19b in adult mice.

|                       | MI-2w            |                      | MI-6w            |                      | MI-11w           |                      | MI-14w           |                      |
|-----------------------|------------------|----------------------|------------------|----------------------|------------------|----------------------|------------------|----------------------|
|                       | Control<br>(N=7) | miR-19a/19b<br>(N=7) | Control<br>(N=7) | miR-19a/19b<br>(N=7) | Control<br>(N=9) | miR-19a/19b<br>(N=9) | Control<br>(N=8) | miR-19a/19b<br>(N=8) |
| IVS;d(mm)             | 1.047±0.013      | 0.990±0.015          | 0.648±0.026      | 0.920±0.019**        | 0.794±0.016      | 1.083±0.026**        | 0.629±0.028      | 0.892±0.028*         |
| IVS;s(mm)             | 1.522±0.015      | 1.612±0.020          | 0.889±0.048      | 1.459±0.025***       | 1.032±0.036      | 1.545±0.020***       | 0.794±0.044      | 1.357±0.043**        |
| LVID;d(mm)            | 3.424±0.090      | 3.006±0.088          | 4.428±0.079      | 3.245±0.066***       | 4.146±0.067      | 3.190±0.051***       | 4.635±0.045      | 3.588±0.057***       |
| LVID;s(mm)            | 2.375±0.099      | 1.577±0.056*         | 3.567±0.107      | 1.939±0.078***       | 3.324±0.094      | 2.046±0.045***       | 3.973±0.073      | 2.297±0.047***       |
| LVPW;d(mm)            | 0.850±0.015      | 0.962±0.034          | 0.784±0.015      | 0.951±0.021*         | 0.778±0.021      | 0.913±0.028          | 0.778±0.017      | 0.912±0.017*         |
| LVPW;s(mm)            | 1.242±0.017      | 1.507±0.022**        | 1.194±0.022      | 1.549±0.027**        | 1.136±0.032      | 1.420±0.025*         | 1.019±0.025      | 1.386±0.021***       |
| EF(%)                 | 59.618±1.985     | 80.252±0.795**       | 40.088±2.215     | 72.061±1.716***      | 37.025±1.410     | 66.626±0.930***      | 30.463±1.638     | 65.919±1.206***      |
| FS(%)                 | 31.551±1.319     | 47.795±0.821***      | 19.915±1.293     | 41.143±1.422***      | 17.904±0.732     | 36.138±0.741***      | 14.595±0.904     | 36.014±0.920***      |
| LV Mass(mg)           | 118.148±4.615    | 100.363±3.583        | 120.366±3.335    | 105.834±3.093        | 124.260±3.641    | 114.742±3.576        | 128.396±3.952    | 117.761±3.537        |
| LV Mass(Corrected,mg) | 94.518±3.692     | 80.291±2.866         | 96.293±2.668     | 84.668±2.474         | 99.408±2.913     | 91.793±2.861         | 102.717±3.161    | 94.209±2.830         |
| LV Vol;d(ul)          | 50.461±3.003     | 37.238±2.516         | 90.772±3.725     | 43.572±2.062***      | 81.362±2.730     | 41.848±1.580***      | 99.819±2.276     | 55.200±2.095***      |
| LV Vol;s(ul)          | 22.158±2.139     | 7.627±0.639*         | 47.524±2.585     | 13.239±1.205         | 52.420±2.611     | 14.322±0.699***      | 70.842±2.990     | 18.824±0.864***      |

Wild type C57BL/6 mice were randomly subjected to tail-vein injection of miR-19a/19b or control mimics after myocardium infarction (MI) surgery, respectively. Echocardiography analyses of cardiac function were performed at multiple time points post-MI surgery from miR-19a/19b and control group. N of each group was indicated. \*:  $P<0.05$ ; \*\*:  $P<0.01$  vs. control group. IVS;d: Interventricular septal thickness at diastole; IVS;s: Interventricular septal thickness at systole; LVID;d: Left ventricular end diastolic internal dimension; LVID;s: Left ventricular end systolic internal dimension; LVPW;d: Left ventricular end diastolic posterior wall dimension; LVPW;s: Left ventricular end systolic posterior wall dimension; EF: Ejection fraction; FS: Fractional shortening; LV Vol;d: Left ventricular end diastolic volume. LV Vol;s: Left ventricular end systolic volume.

**Supplementary table 6. Antibodies used in this study**

| <b>Primary antibodies</b>         |                              |                  |               |                         |
|-----------------------------------|------------------------------|------------------|---------------|-------------------------|
| <b>Antigen</b>                    | <b>Company</b>               | <b>Catalog #</b> | <b>Origin</b> | <b>Working dilution</b> |
| Socs1                             | Abcam                        | ab9870           | Goat          | 1:1000 for WB           |
| Socs3                             | Abcam                        | ab16030          | Rabbit        | 1:1000 for WB           |
| STAT3                             | CST                          | 9139             | Mouse         | 1:1000 for WB           |
| p-STAT3                           | CST                          | 9145             | Rabbit        | 1:1000 for WB           |
| PTEN                              | CST                          | 9188             | Rabbit        | 1:1000 for WB           |
| Bim                               | CST                          | 2933             | Rabbit        | 1:1000 for WB           |
| c-caspase3                        | CST                          | 9661             | Rabbit        | 1:1000 for WB           |
| Bcl2                              | CST                          | 3498             | Rabbit        | 1:1000 for WB           |
| Bax                               | CST                          | 2772             | Rabbit        | 1:1000 for WB           |
| CD80                              | Hangzhou Huaan Biotechnology | M1007-10         | Mouse         | 1:50 for IHC            |
| iNOS                              | Hangzhou Huaan Biotechnology | RT1332           | Rabbit        | 1:200 for IHC           |
| Arginase1                         | Hangzhou Huaan Biotechnology | RT1051           | Rabbit        | 1:200 for IHC           |
| phospho-Histone H3                | Millipore                    | 06-570           | Rabbit        | 1:400 for IF            |
| Aurora B                          | Abcam                        | ab2254           | Rabbit        | 1:100 for IF            |
| Connexin 43                       | Abcam                        | ab11370          | Rabbit        | 1:1000 for IF           |
| PAN cadherin                      | Sigma                        | C3678            | Rabbit        | 1:500 for IF            |
| Alpha-actinin                     | Abcam                        | ab9465           | Mouse         | 1:250 for IF            |
| cTNT                              | DSHB                         | CT3              | Mouse         | 1:500 for IF            |
|                                   |                              |                  |               |                         |
| <b>Secondary antibodies</b>       |                              |                  |               |                         |
| Alexa Fluor® 594 Goat Anti-Mouse  | Invitrogen                   | A-11005          | Goat          | 1:400 for IF            |
| Alexa Fluor® 594 Goat Anti-Rabbit | Invitrogen                   | A-11012          | Goat          | 1:400 for IF            |
| Alexa Fluor® 488 Goat Anti-Mouse  | Invitrogen                   | A-11001          | Goat          | 1:400 for IF            |
| Alexa Fluor® 488 Goat Anti-Rabbit | Invitrogen                   | A-11008          | Goat          | 1:400 for IF            |
|                                   |                              |                  |               |                         |

**Supplementary table 7. Primers Used in This Study**

| <b>SYBR Green PCR primers</b> |                                |                            |
|-------------------------------|--------------------------------|----------------------------|
| Gene                          | Forward                        | Reverse                    |
| Mst1                          | GCCTCCAGCTTAGGAGAATG           | GGAAGTCATTCAGTGGTGAGC      |
| Mst2                          | TGCTGATATACATCCGATGAGG         | CAGACCAAAGTTCAGGTTTCCT     |
| Lats1                         | TCCACAGATGTTTCAGGATTTG         | GAAGAGCTTGAATAACCATGTCC    |
| Lats2                         | GAGGTGCTTCTCCGCAA              | AGCATCTCAAAGAGAATCACACC    |
| Mob1b                         | AACCTACGGATGGCTGTCA            | AAAATCCACAGCTGCAAAGC       |
| Yap                           | AAATGCTCCAAAATGTCAGGA          | CATTCGGAGTCCCTCCATC        |
| Taz                           | GCTGCAGACATCTGCTTCAC           | TGAAGTCCATCCCTTTCTGG       |
| Sav1                          | TACAGGCACCCCTGTGCT             | TGTTGTGGCTGATACGTGATG      |
| Irf9                          | TGAGGCCACCATTAGAGAGG           | AGCAGCAGCGAGTAGTCTGA       |
| PML                           | TGACCTCAAGATTGACAATGAAA        | CAGGGAGACAGCTTTGGAGT       |
| Sp100                         | AGGAATTGATGGAGGGAACC           | AGCTGGCACCAGGTCCTT         |
| Col2A1                        | GAAGGTGCTCAAGTTCTCG            | GCAATTCAGGAGCACCA          |
| Col4A1                        | TGGCACAAAAGGGACGAG             | GGCCAGGAATACCAGGAAGT       |
| Col8A1                        | GGCCAGCCAAGCCTAAAT             | TGATGAACAGTATTCCCAGCA      |
| Tgfb2                         | TTGTTCCACAGGGGTTAAGG           | AGCTCGGTCCTTCAGATCCT       |
| IFI35                         | TCACTTCCGAGTCAAGCTAGG          | TTCTTGGTAGCATTAGGCAGTAAG   |
| Bcl6                          | TTCCGCTACAAGGGCAAC             | CAGCGATAGGGTTTCTCACC       |
| Pik3ap1                       | GACGATGAGCTCTACGAGTCC          | GGCCTGAAGCATTTCACA         |
| Xaf1                          | TGTTGTCAGTGCCGAATTTT           | CCCCTGGAGTTTCTTTTGG        |
| Sle15a2                       | TCTGCTATTTACCCCCATC            | CACCAGGGACAGATAGATGATTG    |
| Acot1                         | TACGATGACCTCCCCAAGAA           | CCAATTCAGGTCCTTTTACC       |
| Clec3b                        | GGAGAAGCAGGCCTTACAGA           | ATGGAAGGTCTTCGGTTGG        |
| Stmn2                         | GGAGCTGTCTATGCTGTCACTG         | CTGCTTACCTCCATGTCG         |
| HDAC11                        | TGCAGACATCACACTGGCTAT          | GGTGGGCATCGAGATCAA         |
| IL-1- $\beta$                 | TCTTCCTAAAGTATGGGCTGGA         | AAAGGGAGCTCCTTAACATGC      |
| IL-6                          | CAAAGCCAGAGTCCTTCAGAG          | GCCACTCCTTCTGTGACTCC       |
| TNF $\alpha$                  | CCACCACGCTCTTCTGTCTA           | AGGGTCTGGGCCATAGAACT       |
| CD68                          | CCAGCTGTTACCTTGACCT            | CAATGATGAGAGGCAGCAAG       |
| MCP-1                         | GTTGGCTCAGCCAGATGCA            | AGCCTACTCATTGGGATCATCTTG   |
| Arginase 1                    | GAATCTGCATGGGCAACC             | GAATCCTGGTACATCTGGGAAC     |
| Cd163                         | TCACTTCTCAGTGCCTCTGC           | CGCCAGTCTCAGTTCCTTCT       |
| IL-10                         | ATCGATTTCTTCCCTGTGAA           | TGGCCTTGTAGACACCTTGG       |
| Socs1                         | GTGGTTGTGGAGGGTGAGAT           | CCTGAGAGGTGGGATGAGG        |
| Socs3                         | ATTCGCTTCGGGACTAGC             | AACTTGCTGTGGGTGACCAT       |
| ANP                           | CAC AGA TCT GAT GGA TTT CAA GA | CCT CAT CTT CTA CCG GCA TC |



|        |                              |                            |
|--------|------------------------------|----------------------------|
| BNP    | GTC AGT CGT TTG GGC TGT AAC  | AGA CCC AGG CAG AGT CAG AA |
| b-MHC  | CGC ATC AAG GAG CTC ACC      | CTG CAG CCG CAG TAG GTT    |
| TGFBR2 | GGCTCTGGTACTCTGGGAAA         | AATGGGGGCTCGTAATCCT        |
| ELN    | TGGAGCAGGACTTGGAGGT          | CCTCCAGCACCATACTTAGCA      |
| FBN1   | CCTTCCTGTGGCTCCAGAT          | GCTGCCCCATTCATACA          |
| Bim    | GGAGACGAGTTCAACGAAACTT       | AACAGTTGTAAGATAACCATTTGAGG |
| Ctgf   | TGACCTGGAGGAAAACATTAAGA      | AGCCCTGTATGTCTTCACACTG     |
| CDK1   | CTCTATTA AAAAGAACTTCGACATCCA | CCATGGACAGGAACTCAAAGA      |
| Cenb1  | TGTGTGAACCAGAGGTGGAA         | GGCTTGGAGAGGGATTATCA       |
| Cend1  | GAGATTGTGCCATCCATGC          | CTCCTCTTCGCACTTCTGCT       |
| THBS1  | CACCTCTCCGGGTTACTGAG         | GCAACAGGAACAGGACACCTA      |
|        |                              |                            |

**ABI Taqman probes accession number**

|                                      |                           |  |
|--------------------------------------|---------------------------|--|
| TaqMan® MicroRNA Assays- hsa-miR-19a | 4427975 (Assay ID 000395) |  |
| TaqMan® MicroRNA Assays- hsa-miR-19b | 4427975 (Assay ID 000396) |  |
| TaqMan® MicroRNA Assays- U6 snRNA    | 4427975 (Assay ID 001973) |  |

## Supplementary Data

### Supplementary Figure1. Pharmacokinetics of miRNA mimics after intra-cardiac injection and myocardial infarction in adult mice.

Immediately after MI surgery, Cy-3 labeled micrONTM agomir Negative Control (10  $\mu\text{g}$  per heart in 50  $\mu\text{l}$ ) were injected into 3 sites around the infarcted area (anterior wall, lateral wall, and apex area). At varied time points (2h, 6h, 12h, 24h, 48h) post myocardial infarction (MI), collected heart samples, performed immune-staining. Representative images of pharmacokinetics of miRNA mimics after intra-cardiac injection and MI in adult mouse heart. Cy3 marks miRNA mimic (red);  $\alpha$ -actinin (ACTN1) marks cardiomyocytes (green); WGA marks cell surface (white) and DAPI labels nuclei (blue).

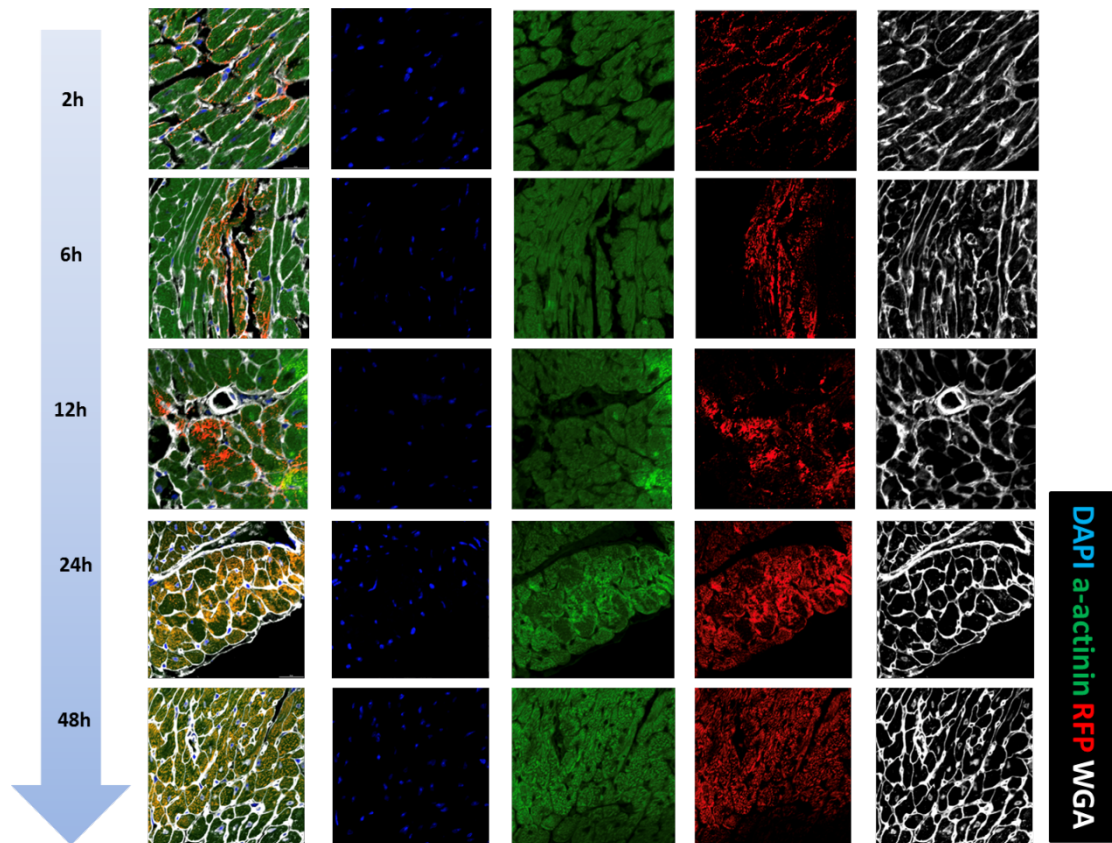

**Supplementary Figure 2. Intra-cardiac injection of miR-19a/19b mimics in adult mice.** (A) Kaplan-Meier survival curves of injection of miR-19a/19b mimics compared to injection of control mimic after MI injury. The n number for each group is indicated. (B) Triphenyltetrazolium chloride (TTC) staining of transverse section of hearts 24h after intra-cardiac injection of 19a/19b or control mimics post MI injury in adult mice. (C) Quantification of TTC staining. n=3. (D) Echocardiography analyses of left ventricle cardiac function of mice 24 h after intra-cardiac injection of individual miR-19a/19b or control mimics post MI. FS%, fractional shortening; EF%, ejection fraction.

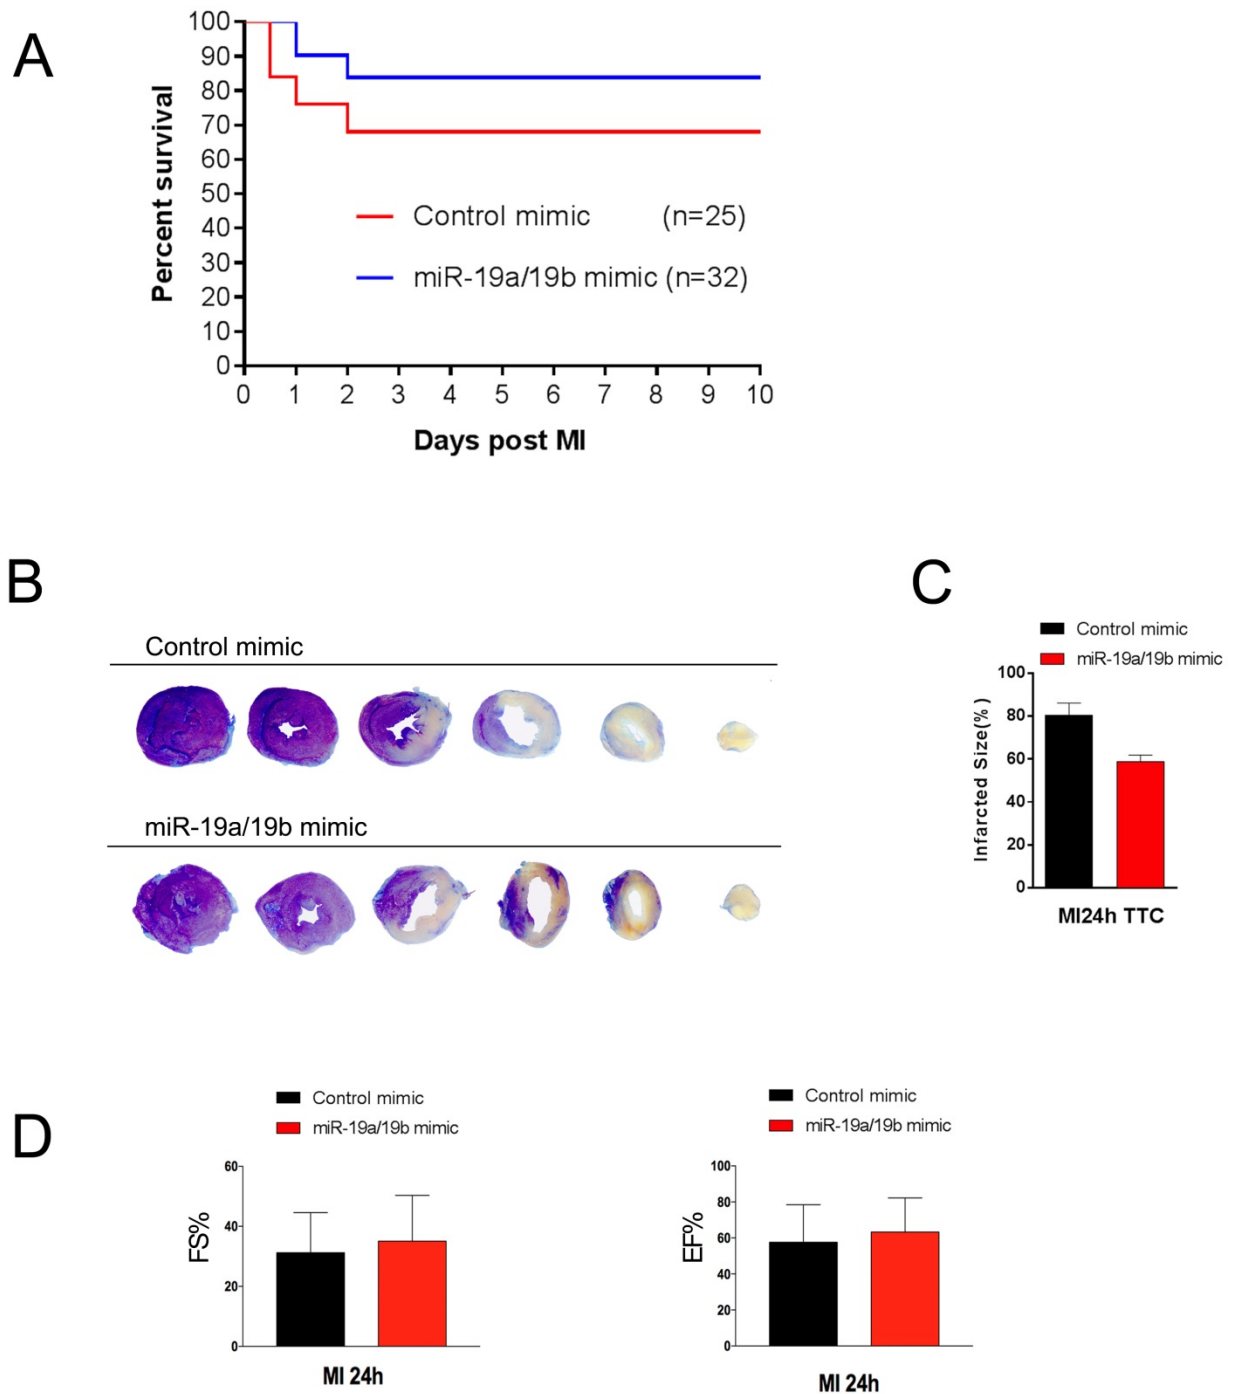

**Supplementary Figure 3. Expression of Hippo/Yap pathway related gene.** Quantitative RT-PCR (qPCR) analyses of the expression of Hippo/Yap pathway related genes (Yap, Taz, Tead1, Last1, Last2, Mst1, Mst2, Sav1, Sav2) in mouse hearts 24, 48 and 72 hours post MI injury with control and miR-19a/19b mimic injection. Data are presented as mean  $\pm$  SEM; \* $P < 0.05$ , relative to control. N=3 for MI-24h samples; N=4-5 for MI-48h samples, N=5-6 for MI-72h samples.

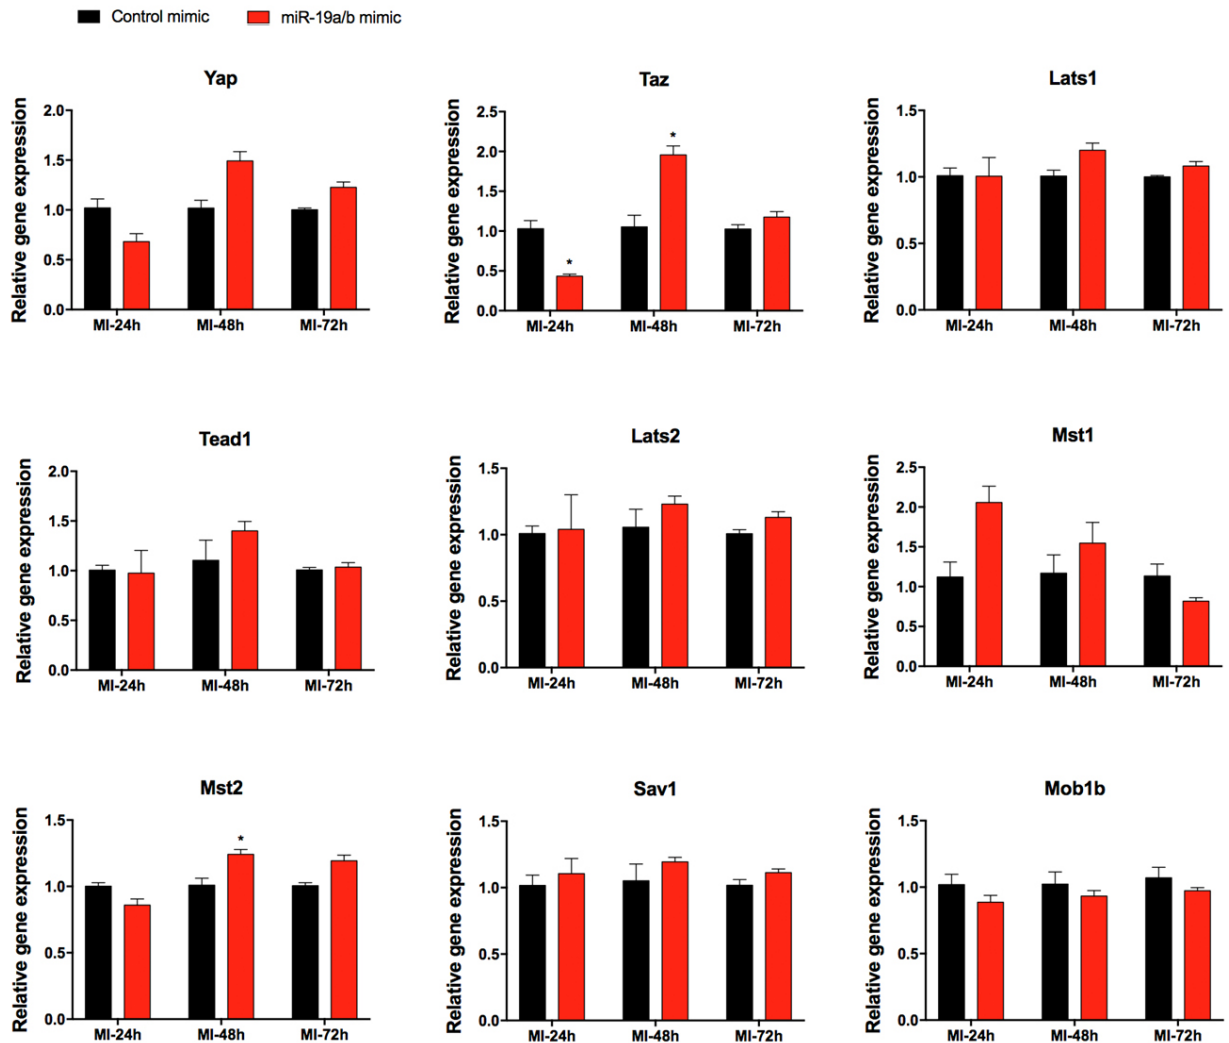

**Supplementary Figure 4. Over expression of miR-19a/19b by AAV9 protected myocardium from apoptosis.**

(A) Western blot analysis of apoptosis marker proteins Caspase-3 and Bim. (B) Quantification of Western blot analysis. N=3, Data are presented as mean  $\pm$  SEM; \*P < 0.05, relative to control.

**A**

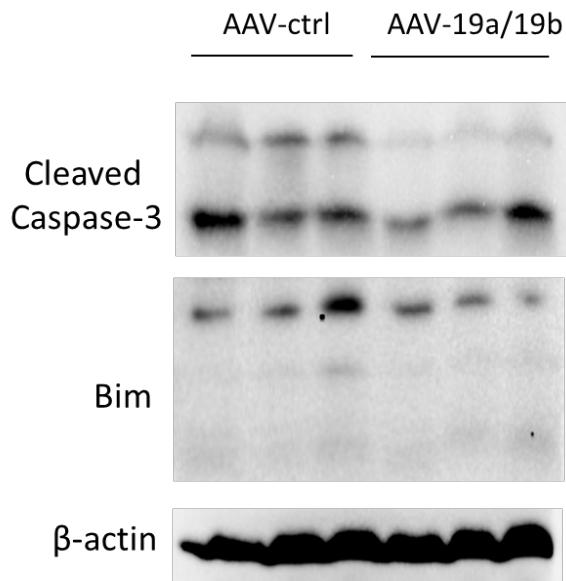

**B**

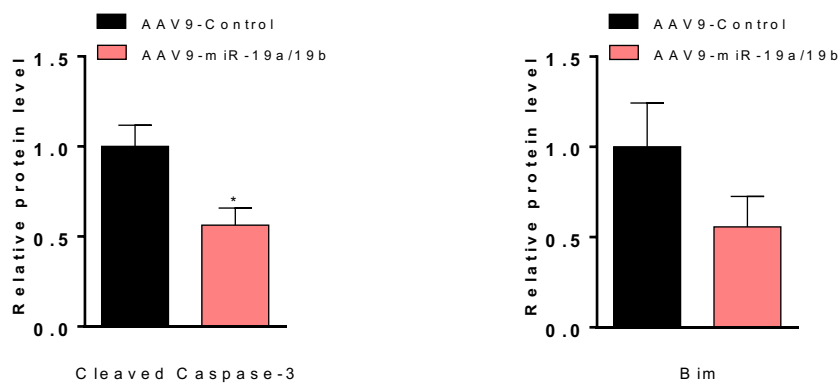

**Supplementary Figure 5. Therapeutic potential of miR-19a/19b mimics via tail-vein RNAiMax delivered in protecting hearts from myocardial infarction injury.**

(A) Schematic of tail-vein injection of RNAiMax delivered miR-19a/19b or control mimics post MI injury. (B) miR-19a expression at 6 h after tail-vein injection post MI. (C-D) Echocardiography analyses of cardiac function in tail-vein injection of RNAiMax delivered miR-19a/19b or control mimics at different time points after MI. FS%, fractional shortening. LVID;s, LV internal dimension at end-systole. (D) Representative images of series of transverse heart sections of injection of miR-19a/19b or control mimic 14 weeks post MI injury. Sirius red/fast green collagen staining marks myocardium (green) and scar (red). (E) Quantification of the size of scar. N=3. Data are presented as mean  $\pm$  SEM; \*P < 0.05, \*\*\*P < 0.01, relative to control.

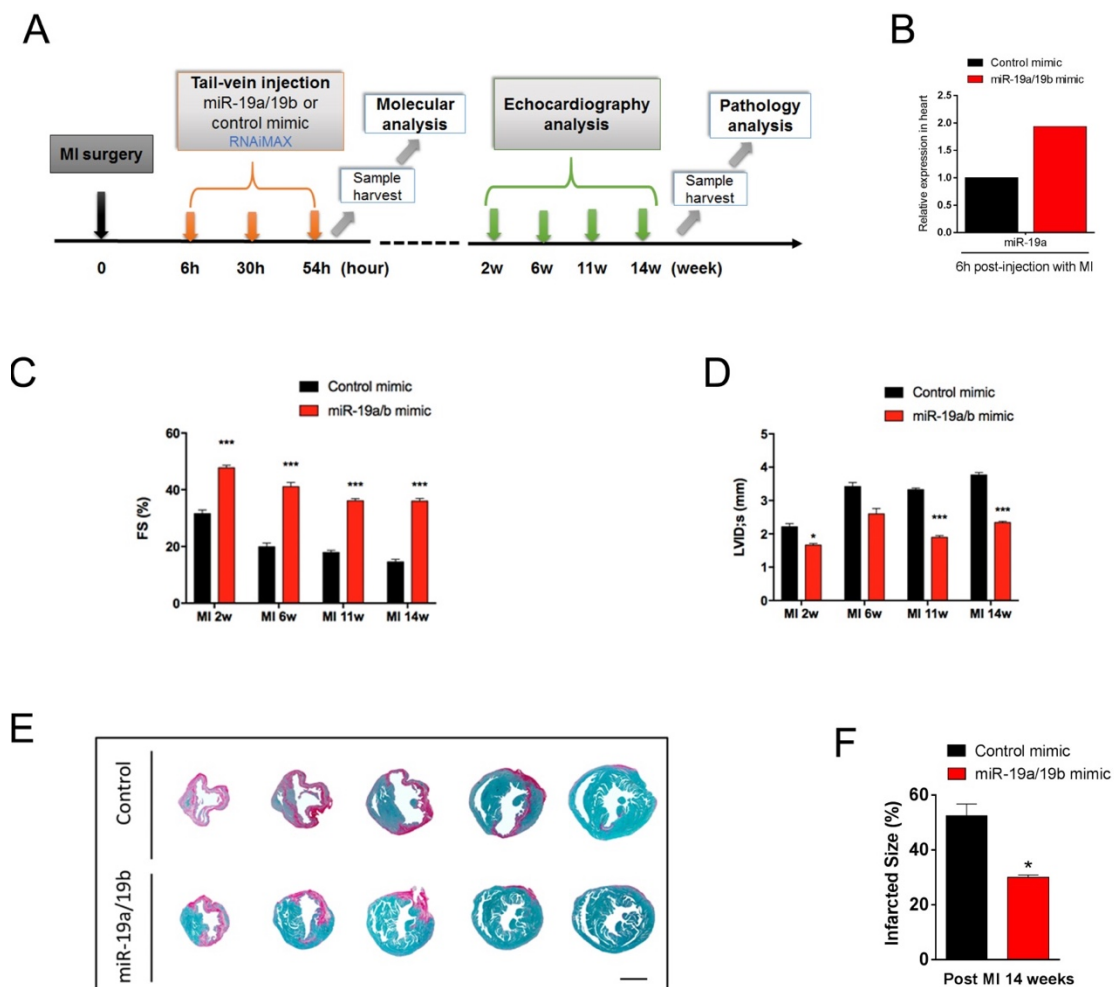

Supplement: 41467_2019_9530_MOESM1_ESM.pdf [file 41467_2019_9530_MOESM1_ESM.pdf]
